# Supplementary material
Source: publisher figshare collection journal article supplement (https://karger.figshare.com/ndownloader/files/8705410)
Supplement: Supplementary file 1 [file 8705410]

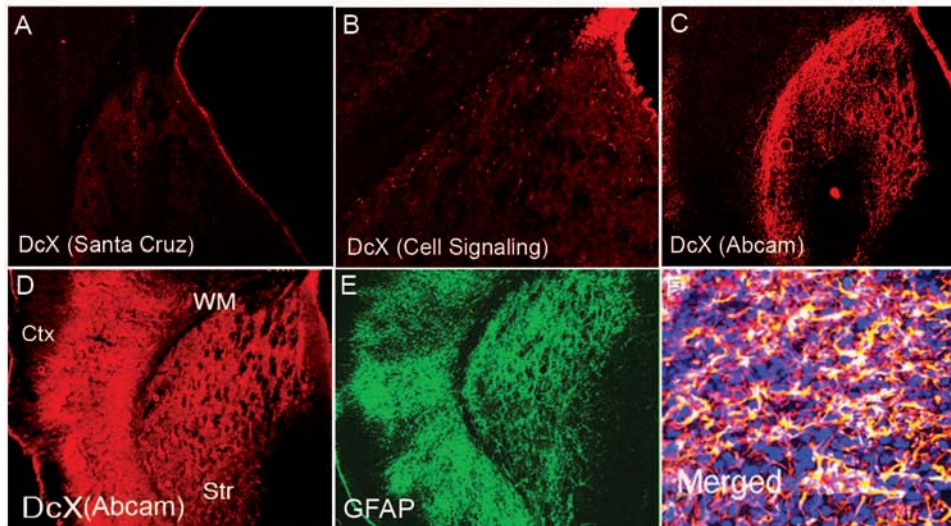

Supplemental Figure 1. Doublecortin labeling using different antibodies. Santa Cruz produced DCx antibody showed weak staining in the striatum and SVZ following mild injury (A, 10x), while Cell Signaling showed a more typical staining pattern (B). Abcam DCx showed a more diffuse staining pattern in mild injury (C), which in severe injury (D, 4x) exactly correlated to GFAP staining (E). Higher magnification of Abcam DCx/GFAP merge image with DAPI nuclear counterstaining is shown (F, 40x).
